# Supplementary material
Source: publisher figshare collection journal article supplement (https://frontiersin.figshare.com/ndownloader/files/16846883)
Supplement: Supplementary file [file 16846883]

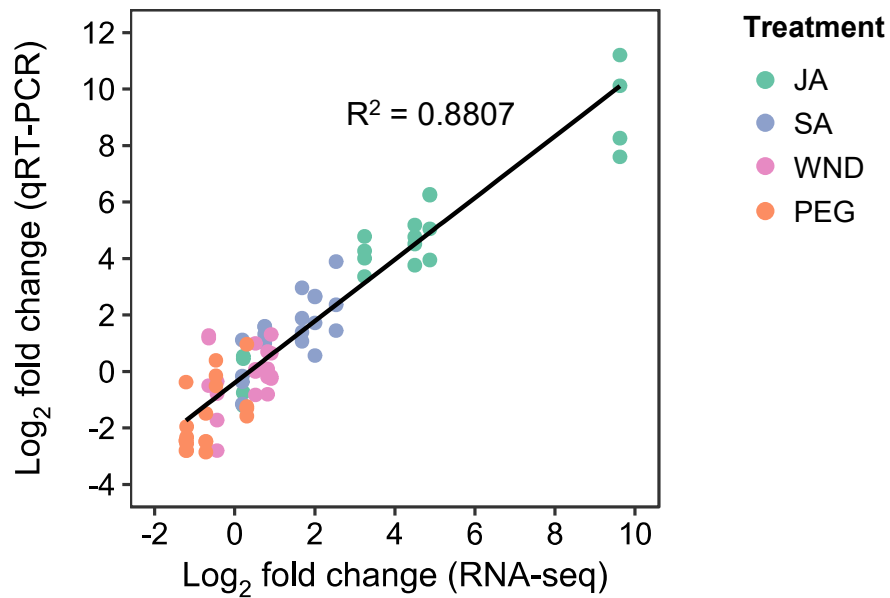

**Supplementary Figure 4. qRT-PCR validation of RNA-seq differential expression results for PAP genes.** Linear regression analysis between qRT-PCR and RNA-seq differential expression results for PAP genes (PAP-I, novel PAP, PAP-II, PAP- $\alpha$ , and PAP-S1). JA, SA, WND, and PEG denote jasmonic acid, salicylic acid, wounding, polyethylene glycol treatments, respectively.  $R^2 = 0.8807$ , showing high correlation between the two methods of determining transcript abundance. Results for qRT-PCR are from at least three independent biological replicates for each transcript.
